# Supplementary material for: Evaluation of the Chemosensoric Properties of Commercially Available Dog Foods Using Electronic Sensors and GC-MS/O Analysis
Source: MDPI journal article supplement (doi:10.3390/molecules28145509), 2023-07-19
Supplement: s1 [file s1]

## Supplementary Material

### Evaluation of the Chemosensory Properties of Commercially Available Dog Foods using Electronic Sensors and GC-MS/O Analysis

Hyangyeon Jeong<sup>1†</sup>, Moon Yeon Youn<sup>2†</sup>, Sojeong Yoon<sup>1</sup>, Seong Jun Hong<sup>1</sup>, Seong Min Jo<sup>1</sup>, Kyeong Soo Kim<sup>3</sup>, Eun Ju Jeong<sup>4</sup>, Hyun-Wook Kim<sup>5</sup>, Eui-Cheol Shin<sup>1,2,6\*</sup>

## 1. Supplementary Tables

**Supplementary Table S1** Volatile compounds of 10 dog foods using E-nose.

| (Peak area x 10 <sup>3</sup> ) |                                      |                     |                  |            |           |           |                  |    |           |     |           |           |
|--------------------------------|--------------------------------------|---------------------|------------------|------------|-----------|-----------|------------------|----|-----------|-----|-----------|-----------|
| Compounds                      | RT <sup>1)</sup> (RI <sup>2)</sup> ) | Sensory description | ASC              | AS         | AP        | AF        | AC               | IS | ITS       | IS2 | IS3       | IS4       |
| <b>Acids and esters(21)</b>    |                                      |                     |                  |            |           |           |                  |    |           |     |           |           |
| Methyl formate                 | 17.58(380)                           | Fruity              | 10.16±0.82       | 12.98±0.60 | 0.28±0.03 | 8.15±1.12 | ND <sup>3)</sup> | ND | ND        | ND  | ND        | ND        |
| Methyl acetate                 | 27.21(533)                           | Fruity              | ND <sup>3)</sup> | ND         | 2.78±0.34 | ND        | ND               | ND | ND        | ND  | ND        | ND        |
| Formic acid                    | 29.78(574)                           | -                   | ND               | 0.53±0.04  | ND        | ND        | ND               | ND | ND        | ND  | ND        | ND        |
| Acetic acid                    | 33.29(616)                           | Sour                | ND               | ND         | 0.13±0.03 | ND        | ND               | ND | ND        | ND  | ND        | ND        |
| Isopropyl acetate              | 36.31(641)                           | Sweet               | ND               | ND         | 0.05±0.09 | ND        | ND               | ND | ND        | ND  | ND        | ND        |
| Propyl acetate                 | 45.21(718)                           | Sweet               | ND               | ND         | ND        | ND        | ND               | ND | ND        | ND  | 0.25±0.06 | ND        |
| Methyl butanoate               | 45.24(719)                           | Sweet               | 0.14±0.03        | ND         | ND        | ND        | 0.06±0.01        | ND | ND        | ND  | ND        | ND        |
| Butyl acetate                  | 54.13(804)                           | -                   | ND               | ND         | ND        | ND        | ND               | ND | ND        | ND  | ND        | 0.21±0.02 |
| Propyl propanoate              | 54.25(806)                           | Fruity, Sweet       | ND               | ND         | ND        | ND        | ND               | ND | 0.18±0.05 | ND  | ND        | ND        |
| Propylacrylate                 | 55.73(823)                           | -                   | ND               | ND         | ND        | 0.10±0.01 | ND               | ND | ND        | ND  | ND        | ND        |

|                        |               |                  |           |           |           |           |           |           |           |           |           |           |
|------------------------|---------------|------------------|-----------|-----------|-----------|-----------|-----------|-----------|-----------|-----------|-----------|-----------|
| Methyl pentanoate      | 55.81(824)    | Fruity, Nutty    | ND        | ND        | ND        | ND        | ND        | ND        | 0.08±0.01 | ND        | ND        | ND        |
| Ethyl 2-methylbutyrate | 57.87(848)    | Sweet            | ND        | 0.16±0.01 |
| Isoamyl acetate        | 59.29(865)    | Fruity, Fresh    | ND        | 0.02±0.03 | ND        | 0.09±0.03 |
| Pentanoic acid         | 61.95(897)    | Beefy, Sweet     | ND        | ND        | ND        | 1.05±0.41 | 1.32±0.06 | ND        | ND        | ND        | ND        | ND        |
| Heptanoic acid         | 71.69(1,142)  | Cheese, Oily     | ND        | 0.07±0.02 | ND        | ND        |
| Benzoic acid           | 71.80(1,143)  | -                | ND        | 0.06±0.05 | ND        |
| Benzyl acetate         | 73.13(1,166)  | Burnt, Sweet     | ND        | 0.11±0.10 | ND        | ND        | ND        | ND        | 0.10±0.06 | ND        | ND        | ND        |
| Methyl cinnamate       | 85.44(1,399)  | Fruity, Sweet    | 0.19±0.04 | 0.21±0.01 | 0.17±0.02 | ND        |
| Methyl dodecanoate     | 91.40(1,531)  | Coconut, Oily    | 0.64±0.04 | ND        | ND        | ND        | 0.11±0.01 | ND        | ND        | ND        | ND        | ND        |
| Octyl caprylate        | 101.51(1,761) | Oily             | ND        | ND        | ND        | 0.09±0.01 | ND        | 0.09±0.02 | 0.09±0.01 | ND        | ND        | ND        |
| Dodecyl butyrate       | 101.66(1,765) | Oily, Fruity     | 0.10±0.03 | ND        | ND        | ND        | 1.69±0.09 | ND        | ND        | ND        | ND        | ND        |
| <b>Alcohols(24)</b>    |               |                  |           |           |           |           |           |           |           |           |           |           |
| Methanol               | 20.33(423)    | -                | ND        | 4.17±0.44 | ND        | 3.20±0.18 | 2.15±0.14 | 3.33±0.41 | 4.89±0.19 | 2.00±0.18 | ND        | ND        |
| Ethanol                | 21.21(437)    | Ethanol, Sweet   | ND        | 1.09±0.04 | ND        | ND        | 0.28±0.05 | 0.89±0.05 | 1.86±0.01 | ND        | ND        | ND        |
| 2-Methyl-2-propanaol   | 23.67(476)    | -                | ND        | ND        | ND        | ND        | ND        | 0.14±0.09 | 0.56±0.04 | 0.29±0.06 | 0.06±0.10 | ND        |
| 2-Propanol             | 25.17(500)    | Ethanal, Acetone | ND        | ND        | 2.74±0.74 | ND        |
| 1-Propanol             | 27.27(534)    | Ethanol, Fruity  | 1.74±0.24 | ND        | ND        | ND        | ND        | ND        | 2.16±0.21 | 1.60±0.18 | 6.30±0.68 | 1.92±0.29 |
| 2-Mercaptoethanol      | 29.63(571)    | Sulfurous        | ND        | 0.64±0.21 | ND        | ND        |
| 2-Butanol              | 29.87(575)    | Oily             | 0.42±0.17 | ND        | ND        | ND        | 2.66±0.07 | ND        | ND        | ND        | ND        | ND        |
| 2-Methyl-1-propanol    | 33.19(615)    | Bitter, Oily     | ND        | ND        | ND        | ND        | ND        | 0.14±0.02 | ND        | ND        | ND        | ND        |

[illegible]

|                  |              |                |           |           |           |           |           |           |    |    |           |           |
|------------------|--------------|----------------|-----------|-----------|-----------|-----------|-----------|-----------|----|----|-----------|-----------|
| Pentanal         | 42.43(693)   | Almond, Green  | ND        | ND        | 0.51±0.16 | ND        | ND        | ND        | ND | ND | ND        | ND        |
| 2-Pentenal       | 47.70(742)   | Oily, Green    | 0.35±0.04 | ND        | ND        | ND        | ND        | ND        | ND | ND | ND        | ND        |
| 2-Methylpentanal | 49.53(760)   | Cheese, Fruity | ND        | ND        | ND        | ND        | 0.06±0.00 | ND        | ND | ND | ND        | 0.06±0.01 |
| 2-Hexenal        | 57.98(850)   | Almond, Oily   | ND        | 0.07±0.01 | ND        | ND        | ND        | ND        | ND | ND | ND        | ND        |
| 2-Nonenal        | 71.71(1,142) | Citrus, Oily   | ND        | ND        | ND        | ND        | 0.04±0.03 | ND        | ND | ND | ND        | ND        |
| 6-Decenal        | 75.26(1,201) | Green          | ND        | 0.09±0.04 | ND        | ND        | ND        | ND        | ND | ND | ND        | ND        |
| 2-Decenal        | 78.75(1,266) | Green          | ND        | ND        | ND        | ND        | ND        | ND        | ND | ND | ND        | 0.03±0.03 |
| α-Terpinen-7-al  | 78.79(1,267) | Oily           | ND        | ND        | 0.02±0.03 | 0.04±0.04 | ND        | 0.02±0.03 | ND | ND | 0.02±0.03 | ND        |
| 2,4-Decadienal   | 79.89(1,287) | Oily, Green    | ND        | ND        | 0.27±0.05 | 0.31±0.02 | ND        | 0.28±0.05 | ND | ND | 0.29±0.07 | ND        |
| Undecanal        | 80.68(1,302) | Citrus, Oily   | 0.34±0.04 | ND        | ND        | ND        | ND        | ND        | ND | ND | ND        | 0.27±0.07 |
| Dodecanal        | 85.81(1,407) | Citrus, Oily   | ND        | ND        | ND        | 0.17±0.01 | ND        | ND        | ND | ND | ND        | ND        |

#### Hydrocarbons(28)

|                    |            |        |           |           |            |           |           |           |           |            |           |           |
|--------------------|------------|--------|-----------|-----------|------------|-----------|-----------|-----------|-----------|------------|-----------|-----------|
| Butane             | 17.61(380) | -      | 0.51±0.37 | ND        | 29.92±3.81 | ND        | ND        | ND        | ND        | ND         | ND        | ND        |
| 2-Methylbutane     | 22.55(459) | -      | ND        | ND        | ND         | 3.45±0.48 | ND        | ND        | ND        | 10.06±1.61 | ND        | ND        |
| Dichloromethane    | 24.77(494) | Sweet  | ND        | 0.26±0.06 | ND         | ND        | 5.16±0.46 | ND        | ND        | ND         | 0.36±0.33 | ND        |
| Acetonitrile       | 27.27(534) | Sweet  | 4.05±0.38 | 6.80±0.13 | ND         | 2.44±0.24 | ND        | ND        | ND        | ND         | ND        | ND        |
| 3-Methylpentane    | 29.82(574) | -      | ND        | ND        | 0.30±0.11  | ND        | 1.55±0.02 | ND        | ND        | ND         | ND        | ND        |
| Hexane             | 31.49(600) | Alkane | 1.59±0.24 | ND        | ND         | ND        | 0.02±0.03 | 1.02±0.10 | 1.59±0.01 | ND         | 1.65±0.09 | 2.21±0.15 |
| 1,2-Dichloroethene | 32.91(612) | Sweet  | ND        | ND        | ND         | ND        | ND        | ND        | ND        | ND         | ND        | ND        |
| Benzene            | 37.98(655) | -      | 0.43±0.03 | ND        | ND         | ND        | ND        | ND        | ND        | ND         | ND        | ND        |
| Trichloroethylene  | 42.36(692) | Sweet  | ND        | 0.18±0.05 | ND         | ND        | ND        | ND        | ND        | ND         | ND        | ND        |
| Heptane            | 42.41(692) | Alkane | ND        | ND        | ND         | ND        | ND        | ND        | 0.37±0.13 | ND         | ND        | ND        |

|                                   |               |               |           |           |           |           |           |           |           |           |           |           |
|-----------------------------------|---------------|---------------|-----------|-----------|-----------|-----------|-----------|-----------|-----------|-----------|-----------|-----------|
| 1,2-Dichloropropane               | 43.55(702)    | Sweet         | ND        | ND        | ND        | ND        | ND        | ND        | 2.47±0.14 | ND        | 1.09±0.04 | ND        |
| Dibromomethane                    | 43.65(703)    | -             | ND        | ND        | ND        | ND        | ND        | 1.00±0.12 | ND        | ND        | ND        | ND        |
| Ethylcyclopentane                 | 46.81(734)    | -             | ND        | 0.32±0.24 | ND        |
| Methylcyclohexane                 | 47.35(739)    | Sweet         | ND        | ND        | ND        | ND        | ND        | 0.08±0.08 | ND        | ND        | ND        | ND        |
| 4-Octene                          | 53.11(794)    | -             | ND        | ND        | 0.09±0.00 | ND        | ND        | 0.06±0.01 | 0.06±0.05 | ND        | 0.24±0.03 | ND        |
| 2,4-Octadiene                     | 55.83(824)    | -             | ND        | ND        | 0.13±0.01 | ND        | 0.06±0.01 | ND        | ND        | ND        | ND        | ND        |
| Chlorobenzene                     | 57.95(849)    | Almond        | ND        | ND        | 0.06±0.01 | ND        | ND        | 0.14±0.02 | ND        | ND        | ND        | ND        |
| Nonane                            | 61.95(897)    | Alkane        | ND        | 1.57±0.17 | 1.36±0.12 | ND        | 2.64±1.20 | 0.52±0.10 | ND        | 0.80±0.25 | ND        | 1.35±0.42 |
| Decane                            | 65.25(998)    | Sweet, Fruity | 3.90±3.13 | 3.51±2.54 | 3.15±1.66 | 3.00±1.33 | ND        | 2.34±1.16 | 2.52±0.94 | 2.06±0.82 | 2.26±0.73 | 2.17±0.72 |
| Limonene                          | 67.23(1,050)  | Citrus        | 1.13±0.51 | 1.01±0.40 | 1.16±0.37 | 1.33±0.64 | ND        | ND        | ND        | ND        | ND        | ND        |
| γ-Terpinene                       | 67.33(1,052)  | Citrus, Oily  | ND        | ND        | ND        | ND        | ND        | 0.29±0.23 | 1.08±0.29 | ND        | ND        | 0.94±0.29 |
| 1,2-Dihydrobenzene                | 67.35(1,053)  | -             | ND        | 0.72±0.40 | ND        | ND        |
| 5-Ethyldecane                     | 71.68(1,141)  | -             | 0.04±0.03 | ND        | ND        | 0.08±0.03 | 0.06±0.06 | ND        | ND        | ND        | ND        | ND        |
| Diterpene                         | 73.36(1,169)  | -             | 0.10±0.02 | ND        | ND        | ND        | 0.16±0.00 | ND        | ND        | ND        | ND        | ND        |
| Tetradecane                       | 85.71(1,405)  | Alkane        | ND        | ND        | ND        | ND        | 0.60±0.03 | 0.16±0.01 | ND        | 0.16±0.03 | 0.18±0.01 | ND        |
| 2,4-Dinitrotoluene                | 91.28(1,529)  | -             | ND        | 0.68±0.03 | 0.66±0.04 | ND        |
| 2-Methylheptadecane               | 101.65(1,764) | -             | ND        | 0.10±0.01 | 0.11±0.01 | ND        |
| <b>Heterocyclic compounds(18)</b> |               |               |           |           |           |           |           |           |           |           |           |           |
| Trimethylamine                    | 20.28(423)    | Amine, Fishy  | 9.58±0.58 | ND        | 2.71±0.34 | 0.80±0.07 | ND        | ND        | ND        | 1.46±0.23 | 3.57±0.23 | ND        |
| Diethyl ether                     | 23.72(477)    | Etheral       | 2.87±0.48 | ND        | ND        | 1.40±0.35 | ND        | ND        | ND        | 2.59±0.30 | ND        | ND        |
| Acetonitrile                      | 26.04(514)    | Sweet         | ND        | ND        | ND        | ND        | ND        | 8.97±1.71 | 2.47±0.18 | 5.28±0.33 | 0.03±0.06 | 5.40±0.51 |

|                                 |               |                    |           |           |           |           |           |           |           |           |           |           |
|---------------------------------|---------------|--------------------|-----------|-----------|-----------|-----------|-----------|-----------|-----------|-----------|-----------|-----------|
| <i>tert</i> -Butyl methyl ether | 28.15(548)    | Fruity,<br>Ethanol | ND        | 2.94±0.04 | 1.30±0.21 | ND        | ND        | ND        | ND        | ND        | 3.94±0.49 | ND        |
| Diisopropyl ether               | 33.01(613)    | Etheral            | ND        | 0.11±0.02 | ND        |
| 1-Butanamine                    | 36.61(644)    | Fishy              | ND        | ND        | ND        | ND        | ND        | 0.17±0.05 | 0.06±0.05 | ND        | ND        | ND        |
| Pyrazine                        | 45.17(718)    | Bitter, Nutty      | 0.19±0.07 | ND        | 0.11±0.03 | 0.09±0.03 | ND        | ND        | 0.13±0.02 | 0.25±0.08 | ND        | ND        |
| Pyrrole                         | 47.65(742)    | Coffee, Nutty      | ND        | ND        | ND        | ND        | ND        | ND        | 0.17±0.09 | 0.29±0.04 | ND        | ND        |
| Dimethylformamide               | 50.95(773)    | Amine              | ND        | 0.37±0.03 | 0.23±0.11 | 0.14±0.07 |
| Dibutyl ether                   | 59.38(866)    | -                  | ND        | 0.02±0.04 | ND        |
| Pentyl-benzene                  | 73.03(1,164)  | Oily               | ND        | 0.10±0.01 | 0.12±0.02 | ND        |
| 2-Methoxy-3-sec-butylpyrazine   | 73.19(1,167)  | Carrot, Musty      | ND        | ND        | ND        | ND        | ND        | 0.13±0.01 | ND        | ND        | ND        | ND        |
| Indole                          | 78.71(1,265)  | Burnt, Sweet       | ND        | ND        | ND        | ND        | ND        | ND        | 0.04±0.03 | 0.02±0.03 | ND        | ND        |
| Anethole                        | 81.07(1,310)  | Oily, Sweet        | ND        | ND        | ND        | ND        | ND        | ND        | 0.32±0.05 | ND        | ND        | ND        |
| Methyl eugenol                  | 85.71(1,405)  | Fresh, Sweet       | ND        | ND        | ND        | ND        | ND        | ND        | 0.18±0.01 | ND        | ND        | 0.18±0.02 |
| Myristicin                      | 91.25(1,528)  | Balsamic           | ND        | ND        | ND        | ND        | ND        | 0.61±0.02 | 0.61±0.06 | 0.67±0.11 | ND        | 0.57±0.03 |
| Propazine                       | 101.45(1,760) | -                  | ND        | 0.11±0.02 |
| Ambroxide                       | 104.69(1,833) | Dry, Sweet         | 2.02±0.08 | ND        | 1.77±0.12 | 1.92±0.21 | ND        | 1.90±0.09 | 1.94±0.15 | 1.83±0.07 | 1.95±0.11 | 1.87±0.12 |
| <b>Ketones(11)</b>              |               |                    |           |           |           |           |           |           |           |           |           |           |
| Propan-2-one                    | 24.82(495)    | Fruity, Sweet      | 1.05±0.47 | ND        |
| 2-Butanone                      | 31.29(600)    | Butter, Sweet      | ND        | 3.21±0.08 | 4.21±0.80 | 1.46±0.16 | 0.38±0.01 | ND        | ND        | 1.49±0.08 | ND        | ND        |
| 1-Hydroxy-2-propanone           | 37.11(648)    | Sweet              | ND        | 0.22±0.01 | ND        | ND        | ND        | ND        | 0.20±0.05 | ND        | 0.45±0.01 | 0.21±0.03 |
| 2-Pentanone                     | 40.37(675)    | Fruity, Sweet      | 0.47±0.07 | ND        | ND        | ND        | 0.09±0.02 | ND        | ND        | 0.18±0.08 | 0.22±0.04 | ND        |

|                                       |              |                    |           |           |           |           |           |           |           |           |           |           |
|---------------------------------------|--------------|--------------------|-----------|-----------|-----------|-----------|-----------|-----------|-----------|-----------|-----------|-----------|
| 3-Penten-2-one                        | 45.11(717)   | -                  | ND        | 0.10±0.13 |
| 2-Hexanone                            | 53.03(793)   | Acetone,<br>Fruity | ND        | ND        | ND        | 0.04±0.04 | 1.06±0.62 | ND        | ND        | ND        | ND        | ND        |
| 3-Hexen-2-one                         | 57.93(849)   | -                  | ND        | ND        | ND        | ND        | ND        | ND        | 0.21±0.02 | ND        | 0.33±0.01 | ND        |
| δ-Hexalactone                         | 68.59(1,085) | Coconut,<br>Creamy | ND        |
| 3-Nonen-2-one                         | 71.59(1,140) | Fruity             | ND        | ND        | ND        | ND        | ND        | 0.08±0.00 | 0.07±0.00 | ND        | 0.09±0.01 | 0.06±0.01 |
| 2-Decanone                            | 75.28(1,201) | Citrus             | 0.06±0.06 | ND        | ND        | ND        | 0.26±0.09 | ND        | ND        | ND        | ND        | ND        |
| δ-Octalactone                         | 79.91(1,288) | Coconut,<br>Sweet  | ND        | 0.29±0.07 | ND        | ND        |
| <b>Furans(5)</b>                      |              |                    |           |           |           |           |           |           |           |           |           |           |
| Furan                                 | 24.71(493)   | Etheral            | ND        | ND        | ND        | 0.27±0.18 | ND        | ND        | ND        | ND        | ND        | 0.08±0.13 |
| 3-Methylfuran                         | 33.06(614)   | -                  | 0.48±0.08 | 0.14±0.02 | ND        |
| 2-Ethylfuran                          | 42.45(693)   | Burnt, Sweet       | ND        | 8.48±0.46 | 0.23±0.04 | ND        | ND        | 0.06±0.05 | ND        | 2.98±0.33 | ND        | 2.10±0.13 |
| Furfural                              | 55.82(824)   | Almond,<br>Sweet   | 0.15±0.01 | 0.15±0.01 | ND        |
| 2-Butylfuran                          | 62.02(898)   | Sweet              | 1.32±0.19 | ND        |
| <b>Sulfur-containing compounds(5)</b> |              |                    |           |           |           |           |           |           |           |           |           |           |
| Methanethiol                          | 23.77(478)   | Fishy              | ND        | ND        | 0.08      | ND        | 0.75      | ND        | ND        | ND        | ND        | ND        |
| Thiophene                             | 40.41(676)   | Sulfurous          | ND        | ND        | 0.31±0.27 | 6.80±0.55 | ND        | 0.77±0.09 | ND        | 2.03±0.33 | ND        | 1.60±0.18 |
| Butanethiol                           | 45.13(717)   | Sulfurous          | ND        | ND        | ND        | ND        | ND        | ND        | 0.19      | ND        | ND        | ND        |
| 2-Methylthiophene                     | 50.84(772)   | Sulfurous          | ND        | 0.45      | ND        | 0.49      | ND        | ND        | ND        | ND        | ND        | ND        |

|           |            |           |    |    |    |    |    |    |      |    |      |    |
|-----------|------------|-----------|----|----|----|----|----|----|------|----|------|----|
| Methional | 62.03(898) | Vegetable | ND | ND | ND | ND | ND | ND | 1.42 | ND | 1.11 | ND |
|-----------|------------|-----------|----|----|----|----|----|----|------|----|------|----|

ASC:Asian\_salmon and chicken, AS: Asian\_salmon, AP: Asian\_poultry, AF: Asian\_fish, AC: Asian\_chicken, IS:International\_salmon, ITS:International\_turkey and salmon, IS2:International\_salmon, IS3:International\_salmon, IS4: :International\_salmon. Data represent the mean ± SD in triplicate. 1)RT: retention time 2)RI: retention indices 3)ND: not detected

Supplementary Table S2 Volatile compounds of 10 dog foods using GC/MS

| (ug/ g)                             |                           |                  |                    |                  |           |           |           |    |           |           |           |           |           |
|-------------------------------------|---------------------------|------------------|--------------------|------------------|-----------|-----------|-----------|----|-----------|-----------|-----------|-----------|-----------|
| Volatile compounds                  | RT <sup>1)</sup><br>(min) | RI <sup>2)</sup> | I.D. <sup>3)</sup> | ASC              | AS        | AP        | AF        | AC | IS        | ITS       | IS2       | IS3       | IS4       |
| Acids and esters(29)                |                           |                  |                    |                  |           |           |           |    |           |           |           |           |           |
| Ethyl 3-hydroxydodecanoate          | 6.79                      | <800             | MS                 | ND <sup>4)</sup> | ND        | ND        | ND        | ND | 0.06±0.01 | ND        | ND        | ND        | ND        |
| 2-Ethylhexyl acrylate               | 7.02                      | <800             | MS                 | ND               | ND        | 0.19±0.01 | ND        | ND | ND        | ND        | ND        | ND        | ND        |
| Heptanoic acid, 1-methylethyl ester | 7.55                      | <800             | MS                 | ND               | ND        | ND        | ND        | ND | 0.84±0.01 | ND        | ND        | ND        | ND        |
| Hexanoic acid                       | 7.65                      | <800             | MS                 | 0.41±0.01        | ND        | ND        | ND        | ND | ND        | 0.31±0.01 | 0.25±0.01 | ND        | ND        |
| Butanoic acid                       | 8.14                      | 815              | MS                 | 2.32±0.01        | 0.57±0.01 | ND        | 0.62±0.19 | ND | 1.18±0.20 | 1.17±0.36 | 1.34±0.76 | 0.90±0.57 | 0.97±0.88 |
| 3-Methylbutanoic acid               | 9.59                      | 860              | MS                 | ND               | 0.22±0.01 | ND        | 0.93±0.36 | ND | 0.25±0.01 | 0.36±0.02 | ND        | 0.80±0.37 | 0.21±0.13 |
| Isovaleric acid                     | 9.77                      | 865              | MS                 | ND               | ND        | ND        | ND        | ND | ND        | ND        | ND        | ND        | 0.51±0.01 |
| 2-Methyl octanoic acid              | 10.07                     | 873              | MS                 | ND               | 0.29±0.18 | ND        | ND        | ND | ND        | 0.52±0.01 | ND        | ND        | 1.52±0.01 |
| 2-Methyl butanoic acid              | 10.09                     | 874              | MS                 | ND               | 0.26±0.01 | 0.31±0.09 | ND        | ND | 0.85±0.01 | ND        | ND        | 1.30±0.31 | 0.60±0.01 |
| Pentanoic acid                      | 11.01                     | 911              | MS/RI              | ND               | 0.55±0.01 | ND        | 2.15±1.45 | ND | ND        | 1.01±0.19 | 1.12±1.01 | ND        | ND        |



|                                          |       |      |    |           |           |           |           |           |           |           |           |           |            |
|------------------------------------------|-------|------|----|-----------|-----------|-----------|-----------|-----------|-----------|-----------|-----------|-----------|------------|
| Propyl-propanedioic acid                 | 11.11 | 901  | MS | ND        | ND        | ND        | ND        | ND        | 1.03±0.01 | ND        | ND        | ND        | ND         |
| 2-Amino-4-methylbenzoic acid             | 11.41 | 911  | MS | ND        | 0.41±0.01 | 1.08±0.01  |
| 4-Methyl-pentanoic acid                  | 12.87 | 956  | MS | 0.09±0.01 | ND        | 0.29±0.01 | ND        | ND        | ND        | ND        | ND        | ND        | 0.175±0.01 |
| Octyl chloroformate                      | 13.53 | 975  | MS | ND        | ND        | 1.07±0.01 | ND         |
| Heptanoic acid                           | 14.08 | 991  | MS | 1.14±0.01 | 0.32±0.01 | 0.28±0.01 | 0.26±0.01 | ND        | 1.51±1.15 | ND        | 0.83±0.18 | ND        | 0.17±0.01  |
| Sobutyl octyl carbonate                  | 15.26 | 1028 | MS | ND        | 1.66±0.01 | ND        | ND         |
| Oxalic acid, 2-ethylhexyl isobutyl ester | 15.63 | 1040 | MS | ND        | ND        | 3.46±0.01 | ND         |
| Decan-2-yl 2-methylbutanoate             | 16.2  | 1058 | MS | ND        | ND        | ND        | ND        | ND        | 0.30±0.01 | ND        | ND        | ND        | ND         |
| 2,4-Hexadienedioic acid                  | 16.81 | 1077 | MS | ND        | ND        | 1.17±0.92 | ND         |
| Sorbic acid                              | 16.86 | 1079 | MS | ND        | ND        | 1.36±0.01 | ND         |
| Heptanoic acid, ethyl ester              | 17.55 | 1099 | MS | 0.33±0.05 | ND         |
| Pentadecyl chloroacetate                 | 17.84 | 1110 | MS | ND        | 0.25±0.01 | ND         |
| Octanoic acid                            | 19.69 | 1173 | MS | 0.22±0.01 | ND        | ND        | ND        | ND        | ND        | 0.15±0.01 | 0.27±0.01 | ND        | ND         |
| Octanoic acid, ethyl ester               | 20.41 | 1197 | MS | 1.17±0.01 | 0.58±0.29 | ND        | ND        | 0.13±0.01 | ND        | ND        | ND        | ND        | ND         |

|                                         |       |      |    |           |           |           |           |           |           |           |           |           |    |
|-----------------------------------------|-------|------|----|-----------|-----------|-----------|-----------|-----------|-----------|-----------|-----------|-----------|----|
| Hexyl-2-methylbutyrate                  | 21.52 | 1238 | MS | ND        | ND        | ND        | ND        | ND        | ND        | 0.07±0.01 | ND        | ND        | ND |
| Hexanedioic acid, dimethyl ester        | 21.73 | 1246 | MS | ND        | 0.26±0.01 | ND        | ND |
| Nonanoic acid                           | 22.3  | 1266 | MS | ND        | ND        | ND        | ND        | ND        | ND        | 0.08±0.01 | ND        | ND        | ND |
| Decanoic acid, ethyl ester              | 25.68 | 1393 | MS | ND        | 1.04±0.59 | 0.09±0.01 | 0.12±0.02 | 0.29±0.01 | ND        | ND        | 0.11±0.01 | ND        | ND |
| Sulfurous acid, 2-propyl tridecyl ester | 25.77 | 1396 | MS | ND        | ND        | 0.07±0.01 | ND        | ND        | ND        | ND        | ND        | ND        | ND |
| <b>Alcohols(19)</b>                     |       |      |    |           |           |           |           |           |           |           |           |           |    |
| Isoamyl alcohol                         | 6.09  | <800 | MS | 1.00±0.01 | ND        | ND |
| 1-Pentanol                              | 6.12  | <800 | MS | 0.81±0.64 | ND        | 0.83±0.07 | ND        | ND        | ND        | ND        | ND        | ND        | ND |
| 1-Butoxy-2-propanol                     | 12.61 | 949  | MS | ND        | 0.65±0.05 | ND |
| Heptanol                                | 13.52 | 975  | MS | ND        | ND        | 1.17±0.01 | ND        | ND        | ND        | ND        | ND        | ND        | ND |
| 1-Octen-3-ol                            | 13.84 | 984  | MS | ND        | 5.06±0.01 | 3.69±0.01 | ND        | ND        | ND        | ND        | ND        | ND        | ND |
| 1-Ethynylcyclopentanol                  | 15.52 | 1037 | MS | ND        | 0.72±0.01 | ND        | ND |
| 3,5-Octadien-2-ol                       | 15.74 | 1044 | MS | 0.50±0.01 | 1.23±0.01 | ND        | ND |
| Cyclohexanol                            | 16.21 | 1059 | MS | 0.69±0.01 | ND        | ND |
| 1-Octanol                               | 16.7  | 1074 | MS | ND        | 0.75±0.01 | ND        | ND |
| 4-Cresol                                | 16.82 | 1077 | MS | ND        | ND        | ND        | ND        | ND        | 0.34±0.05 | ND        | ND        | ND        | ND |
| 9-Octadecen-1-ol                        | 18.72 | 1141 | MS | ND        | ND        | ND        | ND        | 0.05±0.01 | ND        | ND        | ND        | ND        | ND |

|                           |       |      |       |           |             |            |           |           |           |           |           |           |           |
|---------------------------|-------|------|-------|-----------|-------------|------------|-----------|-----------|-----------|-----------|-----------|-----------|-----------|
| 4-Terpineol               | 19.94 | 1181 | MS    | ND        | ND          | ND         | ND        | ND        | ND        | 0.23±0.01 | ND        | ND        | ND        |
| 1-Dodecanethiol           | 20.25 | 1191 | MS    | ND        | ND          | ND         | ND        | ND        | ND        | 0.19±0.01 | ND        | ND        | ND        |
| 1-Tetradecanol            | 20.26 | 1192 | MS    | ND        | ND          | ND         | ND        | ND        | ND        | ND        | 0.04±0.01 | ND        | ND        |
| 2-Hexyl-1-octanol         | 23.62 | 1314 | MS    | 0.07±0.01 | ND          | ND         | ND        | ND        | ND        | ND        | ND        | ND        | ND        |
| 2-Vinylguaiacol           | 23.67 | 1316 | MS    | ND        | ND          | ND         | ND        | ND        | ND        | ND        | 0.23±0.16 | ND        | ND        |
| 2-Butyl-2,7-octadien-1-ol | 25.17 | 1374 | MS    | ND        | 0.11±0.09   | 0.08±0.01  | ND        |
| 4-Benzene-1,2-diol        | 25.93 | 1403 | MS    | 0.04±0.01 | ND          | ND         | ND        | ND        | ND        | ND        | ND        | ND        | ND        |
| <i>p</i> -Guaiacol        | 27.97 | 1486 | MS    | 0.03±0.01 | ND          | ND         | ND        | ND        | ND        | ND        | ND        | ND        | ND        |
| 2,6-bis- <i>p</i> -Cresol | 27.59 | 1471 | MS    | 0.03±0.01 | 0.29±0.18   | 0.18±0.03  | ND        | ND        | 0.11±0.02 | 0.18±0.01 | ND        | ND        | ND        |
| <b>Aldehydes(17)</b>      |       |      |       |           |             |            |           |           |           |           |           |           |           |
| 3-Methyl-butanal          | 4.41  | <800 | MS    | 0.03±0.01 | 0.75±0.01   | 0.04±0.01  | ND        | 0.29±0.01 | ND        | ND        | ND        | ND        | ND        |
| Pentanal                  | 4.61  | <800 | MS    | ND        | 0.26±0.01   | ND         | ND        | ND        | ND        | ND        | ND        | ND        | ND        |
| 2-Pentenal                | 6.57  | <800 | MS    | ND        | ND          | ND         | ND        | ND        | ND        | ND        | ND        | ND        | 0.07±0.01 |
| 3-Methoxy-propanal        | 7.72  | <800 | MS    | ND        | ND          | ND         | ND        | ND        | ND        | ND        | 0.22±0.01 | ND        | ND        |
| Hexanal                   | 7.95  | 808  | MS/RI | ND        | 18.26±16.62 | 46.21±1.76 | 3.42±0.01 | 4.60±0.94 | ND        | ND        | ND        | ND        | 4.71±1.61 |
| 3-Furaldehyde             | 9.02  | 843  | MS    | ND        | ND          | ND         | ND        | ND        | ND        | ND        | 0.09±0.01 | ND        | ND        |
| 4-Hexenal                 | 9.78  | 865  | MS    | 2.73±0.01 | ND          | ND         | ND        | ND        | ND        | ND        | ND        | ND        | ND        |
| Heptanal                  | 11.27 | 906  | MS/RI | ND        | 1.61±0.01   | ND         | ND        | ND        | 0.77±0.01 | ND        | ND        | 0.66±0.01 | 0.85±0.60 |
| Benzaldehyde              | 13.22 | 966  | MS/RI | 2.15±0.01 | 2.59±1.83   | 2.35±0.08  | 1.52±0.33 | 0.71±0.37 | ND        | ND        | 2.86±1.06 | 2.66±0.42 | 1.85±0.55 |

|                        |       |      |       |           |            |           |           |           |           |           |           |           |            |
|------------------------|-------|------|-------|-----------|------------|-----------|-----------|-----------|-----------|-----------|-----------|-----------|------------|
| Octanal                | 14.59 | 1005 | MS/RI | 2.80±0.21 | 3.26±1.02  | 3.64±1.19 | ND         |
| 2,4-Heptadienal        | 14.83 | 1014 | MS    | ND        | ND         | ND        | ND        | 1.87±0.04 | ND        | ND        | ND        | ND        | ND         |
| Benzeneacetaldehyde    | 15.9  | 1049 | MS    | ND        | 0.78±0.01  | ND        | ND        | ND        | 0.35±0.01 | ND        | 0.89±0.01 | ND        | ND         |
| Nonanal                | 17.72 | 1105 | MS/RI | 1.98±0.28 | 2.47±1.11  | 3.65±1.13 | 1.00±0.20 | 1.25±0.01 | 0.73±0.18 | 0.80±0.02 | 1.44±0.49 | 0.71±0.24 | 9.49±11.61 |
| 2,5-bis-benzaldehyde   | 17.99 | 1115 | MS    | ND        | ND         | ND        | ND        | ND        | ND        | ND        | ND        | ND        | 1.00±0.01  |
| Decanal                | 20.67 | 1206 | MS/RI | 0.07±0.01 | ND         | 0.10±0.01 | ND         |
| $\beta$ -Cyclocitral   | 21.17 | 1225 | MS    | 0.07±0.01 | ND         | ND        | ND        | ND        | 0.03±0.01 | 0.07±0.01 | ND        | ND        | ND         |
| 2-Butyl-2-octenal      | 25.17 | 1374 | MS    | ND        | ND         | 0.07±0.01 | ND        | ND        | ND        | ND        | 0.09±0.01 | ND        | ND         |
| <b>Hydrocabons(67)</b> |       |      |       |           |            |           |           |           |           |           |           |           |            |
| Methylbenzene          | 6.99  | <800 | MS    | ND        | 12.44±6.65 | ND        | 2.85±0.01 | ND        | ND        | 0.71±0.23 | ND        | ND        | 2.12±0.06  |
| 1,3,5-Cycloheptatriene | 7.15  | <800 | MS    | ND        | ND         | ND        | ND        | ND        | ND        | 0.51±0.01 | 0.19±0.01 | ND        | ND         |
| Ethylbenzene           | 9.93  | 870  | MS    | ND        | ND         | ND        | ND        | 0.14±0.01 | ND        | ND        | ND        | ND        | ND         |
| 4-Methyl-octane        | 9.99  | 871  | MS    | 1.95±0.83 | ND         | ND        | ND        | ND        | ND        | ND        | 0.22±0.01 | ND        | ND         |
| 1,4-Dimethylbenzene    | 10.18 | 876  | MS    | ND        | ND         | ND        | 2.00±1.07 | ND        | ND        | ND        | ND        | ND        | ND         |
| 1,3-Dimethylbenzene    | 10.26 | 879  | MS    | ND        | 1.47±0.01  | ND        | 1.48±0.01 | ND        | ND        | ND        | ND        | ND        | ND         |
| Pulegone               | 11.64 | 918  | MS    | ND        | ND         | 0.76±0.01 | ND         |
| Sulfonylbis-methane    | 11.81 | 924  | MS    | ND        | ND         | ND        | ND        | 0.83±0.01 | ND        | ND        | ND        | ND        | ND         |

|                                |       |      |       |           |           |           |           |           |           |           |           |           |           |
|--------------------------------|-------|------|-------|-----------|-----------|-----------|-----------|-----------|-----------|-----------|-----------|-----------|-----------|
| <i>trans</i> -Ocimene          | 12.34 | 940  | MS    | ND        | ND        | ND        | ND        | 0.03±0.01 | ND        | ND        | ND        | ND        | ND        |
| $\alpha$ -Pinene               | 12.33 | 941  | MS    | ND        | ND        | ND        | ND        | ND        | 0.40±0.09 | 0.35±0.19 | ND        | 0.57±0.06 | 0.37±0.01 |
| 1,2,3-Trimethylcyclopentane    | 13.54 | 976  | MS    | ND        | 2.42±0.92 | ND        |
| 2-Decene                       | 13.65 | 979  | MS    | ND        | ND        | ND        | 0.46±0.01 | ND        | ND        | ND        | ND        | ND        | ND        |
| Fucose                         | 14.01 | 989  | MS    | ND        | ND        | 0.76±0.01 | ND        |
| 2,2,4,6,6-Pentamethylheptan    | 14.18 | 993  | MS    | ND        | 4.60±0.01 | 5.83±0.01 |
| 2,2-Dimethyltetradecane        | 15.23 | 1027 | MS    | ND        | ND        | ND        | ND        | ND        | ND        | 1.40±0.07 | ND        | ND        | 1.96±0.69 |
| 1-Ethyl-2,4-dimethylbenzene    | 15.31 | 1030 | MS    | ND        | 0.35±0.01 | ND        |
| 3-Methyloctane                 | 15.38 | 1032 | MS    | ND        | ND        | ND        | 0.93±0.01 | ND        | ND        | ND        | ND        | ND        | ND        |
| 2,5-Dimethylheptane            | 15.4  | 1033 | MS    | ND        | ND        | 1.53±0.01 | ND        |
| Limonene                       | 15.44 | 1034 | MS/RI | ND        | ND        | ND        | ND        | ND        | 0.53±0.13 | ND        | ND        | ND        | ND        |
| 2,2,8-Trimethyldecane          | 15.47 | 1035 | MS    | ND        | 1.38±0.01 | ND        | ND        |
| 3-Ethyl-2-methyl-1,3-hexadiene | 15.5  | 1036 | MS    | 0.69±0.01 | 1.10±0.01 | 0.75±0.01 | ND        |
| 3,3-Dimethylhexane             | 15.56 | 1038 | MS    | ND        | 3.48±0.01 |
| 2,6,10-Trimethyldodecane       | 15.63 | 1040 | MS    | ND        | ND        | 2.90±0.01 | ND        |

|                            |       |      |    |           |           |           |           |    |    |           |           |    |           |
|----------------------------|-------|------|----|-----------|-----------|-----------|-----------|----|----|-----------|-----------|----|-----------|
| 5-Methyl-octadecane,       | 15.9  | 1049 | MS | ND        | ND        | ND        | 0.52±0.16 | ND | ND | ND        | ND        | ND | ND        |
| Propyl-cyclopentane        | 15.97 | 1051 | MS | ND        | ND        | ND        | 0.06±0.01 | ND | ND | ND        | ND        | ND | ND        |
| 6-Methyl-tridecane         | 16.03 | 1053 | MS | ND        | ND        | ND        | ND        | ND | ND | ND        | ND        | ND | 0.24±0.01 |
| 2,6,8-Trimethyl-decane     | 16.06 | 1054 | MS | ND        | ND        | 1.72±0.01 | ND        | ND | ND | ND        | ND        | ND | ND        |
| 5-Butylnonane              | 16.09 | 1055 | MS | 0.49±0.01 | ND        | ND        | ND        | ND | ND | ND        | ND        | ND | ND        |
| 7,9-Dimethylhexadecane     | 16.1  | 1055 | MS | ND        | ND        | ND        | ND        | ND | ND | ND        | 0.52±0.01 | ND | ND        |
| 2-Methyldecane             | 16.19 | 1058 | MS | ND        | ND        | ND        | 2.08±0.15 | ND | ND | 1.45±0.01 | 1.94±0.01 | ND | 1.90±0.01 |
| 2,3-Epoxyheptane           | 16.21 | 1059 | MS | 0.68±0.01 | ND        | ND        | ND        | ND | ND | ND        | ND        | ND | ND        |
| 2,2,3,4-Tetramethylpentane | 16.27 | 1061 | MS | ND        | ND        | 0.58±0.01 | ND        | ND | ND | ND        | ND        | ND | ND        |
| 2,3,6-Trimethyldecane      | 16.32 | 1062 | MS | ND        | ND        | ND        | ND        | ND | ND | ND        | 3.56±0.01 | ND | ND        |
| 3-Methylhexadecane         | 16.48 | 1067 | MS | ND        | ND        | 0.49±0.01 | ND        | ND | ND | ND        | ND        | ND | ND        |
| 3,8-Dimethyldecane         | 16.49 | 1068 | MS | ND        | ND        | ND        | ND        | ND | ND | ND        | 2.96±0.01 | ND | ND        |
| 5-Methyltridecane          | 16.69 | 1074 | MS | ND        | 1.41±0.01 | ND        | 1.68±0.01 | ND | ND | ND        | ND        | ND | ND        |
| 4,8-Dimethylundecane       | 16.85 | 1078 | MS | ND        | ND        | ND        | 1.86±0.01 | ND | ND | ND        | ND        | ND | ND        |

|                             |       |      |    |    |           |    |           |           |    |           |           |           |           |
|-----------------------------|-------|------|----|----|-----------|----|-----------|-----------|----|-----------|-----------|-----------|-----------|
| 2,8-Dimethyl-undecane       | 16.87 | 1079 | MS | ND | ND        | ND | ND        | ND        | ND | 1.44±0.03 | ND        | ND        | 2.88±1.49 |
| 7-Methylhexadecane          | 17.04 | 1084 | MS | ND | ND        | ND | 0.56±0.01 | ND        | ND | ND        | ND        | ND        | ND        |
| 2,3,6,7-Tetramethyloctane   | 17.11 | 1086 | MS | ND | ND        | ND | ND        | 0.90±0.01 | ND | ND        | 2.00±0.01 | 2.08±0.01 | ND        |
| 3-Ethyltetracosane          | 17.17 | 1088 | MS | ND | ND        | ND | ND        | ND        | ND | ND        | ND        | ND        | 0.49±0.01 |
| 3,3-Dimethylhexane          | 17.27 | 1091 | MS | ND | ND        | ND | ND        | 0.47±0.01 | ND | ND        | 1.53±0.01 | ND        | ND        |
| 2-Methyldodecane            | 17.56 | 1099 | MS | ND | ND        | ND | 0.32±0.01 | ND        | ND | ND        | ND        | ND        | ND        |
| 4-Methylundecane            | 17.67 | 1103 | MS | ND | ND        | ND | ND        | ND        | ND | ND        | 4.46±0.90 | ND        | ND        |
| Dimethyl-4-aniline          | 18    | 1115 | MS | ND | ND        | ND | ND        | ND        | ND | ND        | ND        | 2.81±0.01 | ND        |
| 1-Ethyl-3,5-dimethylbenzene | 18.24 | 1124 | MS | ND | ND        | ND | 0.19±0.08 | ND        | ND | ND        | ND        | ND        | ND        |
| 2,2,6-Trimethyldecane       | 18.32 | 1127 | MS | ND | ND        | ND | ND        | ND        | ND | ND        | 0.47±0.01 | ND        | ND        |
| Tridecane                   | 18.41 | 1129 | MS | ND | ND        | ND | ND        | 0.30±0.01 | ND | ND        | ND        | 0.16±0.01 | ND        |
| 2,3,5-Trimethyldecane       | 18.88 | 1146 | MS | ND | ND        | ND | ND        | ND        | ND | ND        | ND        | ND        | 0.19±0.01 |
| 6,6-Diethyloctadecane       | 18.9  | 1147 | MS | ND | 0.03±0.01 | ND | ND        | ND        | ND | ND        | ND        | ND        | ND        |

|                                 |       |      |       |           |           |           |           |           |    |           |           |           |           |
|---------------------------------|-------|------|-------|-----------|-----------|-----------|-----------|-----------|----|-----------|-----------|-----------|-----------|
| 2-Butyl-1-decene                | 19.55 | 1169 | MS    | ND        | ND        | ND        | ND        | ND        | ND | ND        | ND        | ND        | 0.14±0.01 |
| 3-Methyl-undecane               | 19.65 | 1172 | MS    | ND        | 0.52±0.01 | ND        | ND        | ND        | ND | ND        | ND        | ND        | ND        |
| 1-Tridecene                     | 20.25 | 1130 | MS    | ND        | ND        | ND        | ND        | ND        | ND | 0.20±0.01 | ND        | ND        | 0.29±0.01 |
| Dodecane                        | 20.47 | 1198 | MS/RI | ND        | 0.49±0.23 | 0.49±0.04 | 0.12±0.03 | 0.45±0.01 | ND | ND        | ND        | 0.28±0.10 | 0.77±0.45 |
| 8-Methyl-heptadecane            | 22.7  | 1280 | MS    | 1.76±0.01 | ND        | ND        | ND        | ND        | ND | ND        | ND        | ND        | ND        |
| 1-Methyl-4-cyclohexane          | 23.13 | 1295 | MS    | ND        | ND        | ND        | ND        | ND        | ND | 0.56±0.01 | ND        | ND        | ND        |
| 2,4-Dimethyldecane              | 23.21 | 1298 | MS    | ND        | ND        | ND        | ND        | ND        | ND | ND        | 0.04±0.01 | ND        | ND        |
| 2-Methyldodecane                | 23.28 | 1300 | MS    | 0.34±0.01 | ND        | ND        | ND        | ND        | ND | ND        | ND        | ND        | ND        |
| 3,3-Dimethylhexane              | 24.15 | 1335 | MS    | 0.59±0.01 | ND        | ND        | ND        | ND        | ND | ND        | ND        | ND        | ND        |
| 2-Isopropenyl- <i>p</i> -cymene | 24.85 | 1362 | MS    | 0.04±0.01 | ND        | ND        | ND        | ND        | ND | ND        | ND        | ND        | ND        |
| 3-Methylheneicosane             | 25.04 | 1369 | MS    | ND        | 0.04±0.01 | ND        | ND        | ND        | ND | ND        | ND        | ND        | ND        |
| Tetradecane                     | 25.77 | 1397 | MS/RI | ND        | ND        | ND        | ND        | 0.08±0.01 | ND | ND        | 0.13±0.01 | ND        | 0.16±0.01 |
| <i>trans</i> -Caryophyllene     | 26.49 | 1426 | MS    | ND        | ND        | ND        | ND        | ND        | ND | 0.09±0.01 | ND        | ND        | ND        |
| Tritetracontane                 | 28.02 | 1488 | MS    | 0.05±0.01 | ND        | ND        | ND        | ND        | ND | ND        | ND        | ND        | ND        |
| 2,6,10-Trimethylpentadecane     | 29.09 | 1533 | MS    | ND        | ND        | ND        | ND        | ND        | ND | ND        | 0.03±0.01 | ND        | ND        |



[illegible]

|                               |       |      |       |           |           |           |           |           |           |    |           |           |           |
|-------------------------------|-------|------|-------|-----------|-----------|-----------|-----------|-----------|-----------|----|-----------|-----------|-----------|
| 2-Ethyl-3,5-dimethyl-pyrazine | 16.97 | 1082 | MS    | 1.16±0.08 | 0.89±0.28 | 1.03±0.01 | 1.22±0.31 | 0.65±0.01 | 0.49±0.08 | ND | ND        | ND        | ND        |
| Tetramethyl-pyrazine          | 17.21 | 1089 | MS    | ND        | 1.38±0.44 | ND        | ND        | ND        | ND        | ND | ND        | ND        | ND        |
| 3-Methyl-1H-indazole          | 17.58 | 1100 | MS    | ND        | ND        | ND        | ND        | ND        | 0.16±0.01 | ND | ND        | ND        | ND        |
| 2-Droxybenzylpyrrole          | 17.9  | 1112 | MS    | 2.83±0.01 | ND        | 1.31±0.01 | ND        | ND        | ND        | ND | 0.67±0.01 | ND        | ND        |
| Maltol                        | 17.94 | 1113 | MS    | ND        | ND        | ND        | ND        | ND        | ND        | ND | ND        | 0.35±0.01 | ND        |
| 2-3-Indole                    | 19    | 1151 | MS    | 0.14±0.01 | 0.25±0.01 | ND        | ND        | ND        | 0.23±0.01 | ND | 0.39±0.01 | 0.26±0.01 | ND        |
| Hexadecylene oxide            | 20.66 | 1205 | MS    | ND        | 0.06±0.01 | ND        | ND        | ND        | ND        | ND | ND        | ND        | ND        |
| 1-2-Pyrrolidon                | 20.86 | 1213 | MS    | ND        | ND        | ND        | ND        | ND        | ND        | ND | ND        | ND        | 0.12±0.01 |
| Butylhydroxyanisole           | 27.96 | 1486 | MS    | ND        | 0.07±0.05 | ND        | 0.42±0.01 | ND        | ND        | ND | 0.72±0.58 | ND        | 0.11±0.01 |
| Dihydroactinidiolide          | 29.13 | 1535 | MS    | ND        | ND        | ND        | ND        | ND        | 0.04±0.01 | ND | ND        | ND        | ND        |
| <b>Ketones(18)</b>            |       |      |       |           |           |           |           |           |           |    |           |           |           |
| 2-Heptanone                   | 10.95 | 897  | MS    | ND        | ND        | 0.03±0.03 | ND        | 0.80±0.32 | ND        | ND | ND        | ND        | ND        |
| Dimethyl sulfone              | 11.83 | 924  | MS/RI | ND        | ND        | ND        | ND        | 0.73±0.01 | ND        | ND | ND        | ND        | ND        |
| 4,4-Dimethylcyclohexan-1-one  | 13.54 | 976  | MS    | 0.86±0.01 | ND        | ND        | ND        | ND        | ND        | ND | ND        | ND        | ND        |
| 2,3-Octanedione               | 14.01 | 988  | MS    | ND        | 1.81±0.01 | ND        | ND        | ND        | ND        | ND | ND        | ND        | ND        |
| 6-Methyl-5-hepten-2-one       | 14.06 | 990  | MS    | ND        | ND        | ND        | ND        | ND        | ND        | ND | ND        | ND        | 2.03±0.01 |
| 3-Octen-2-one                 | 15.72 | 1043 | MS/RI | 0.54±0.01 | 0.80±0.01 | 1.24±0.01 | ND        | ND        | ND        | ND | ND        | ND        | ND        |

|                                            |       |      |    |           |           |           |           |           |           |           |           |           |           |
|--------------------------------------------|-------|------|----|-----------|-----------|-----------|-----------|-----------|-----------|-----------|-----------|-----------|-----------|
| $\gamma$ -Hexalactone                      | 16.22 | 1059 | MS | ND        | 0.82±0.22 | ND        |
| 1-Phenylethanone                           | 16.6  | 1071 | MS | ND        | ND        | ND        | ND        | 0.62±0.01 | ND        | ND        | ND        | ND        | ND        |
| 3,5-Octadiene-2-one                        | 16.71 | 1074 | MS | ND        | ND        | ND        | ND        | 5.83±2.17 | 0.86±0.21 | 3.14±0.12 | ND        | ND        | ND        |
| 2-Nonanone                                 | 17.36 | 1094 | MS | 0.62±0.05 | 1.22±0.77 | ND        |
| 5-Methyl-2-cyclohexanone                   | 19.57 | 1169 | MS | ND        | ND        | ND        | ND        | ND        | ND        | 2.08±0.01 | ND        | ND        | ND        |
| 2-Piperidinone                             | 19.81 | 1177 | MS | ND        | 0.24±0.01 | ND        | 0.17±0.07 | ND        | ND        | ND        | ND        | 1.46±0.44 | 0.29±0.20 |
| 2-Decanone                                 | 20.3  | 1193 | MS | 0.34±0.08 | ND        | ND        | 0.10±0.01 | ND        | ND        | ND        | 0.25±0.15 | ND        | ND        |
| <i>tert</i> -Butyl- <i>p</i> -benzoquinone | 20.6  | 1203 | MS | ND        | ND        | ND        | ND        | ND        | 0.84±0.01 | ND        | ND        | ND        | ND        |
| Chrysanthenone                             | 20.88 | 1214 | MS | ND        | 0.30±0.01 | ND        |
| Carvone                                    | 21.8  | 1248 | MS | ND        | ND        | ND        | ND        | ND        | ND        | 0.28±0.01 | ND        | ND        | ND        |
| 3-Butyl-2-cyclohexen-1-one                 | 22.41 | 1270 | MS | 0.07±0.01 | ND        |
| 2,5-Dimethyl-crotonophenone                | 24.83 | 1361 | MS | ND        | ND        | 0.03±0.01 | ND        |
| <b>Furans(7)</b>                           |       |      |    |           |           |           |           |           |           |           |           |           |           |
| 2,5-Dimethylfuran                          | 9.06  | 844  | MS | 1.18±0.01 | ND        | ND        | ND        | ND        | ND        | ND        | 0.92±0.01 | ND        | ND        |
| 2-Furancarboxaldehyde                      | 9.08  | 845  | MS | 0.97±0.01 | ND        | ND        | 0.44±0.01 | ND        | ND        | ND        | 0.31±0.08 | ND        | ND        |
| Furfural                                   | 9.15  | 847  | MS | 1.30±0.01 | ND        | ND        | ND        | ND        | ND        | ND        | 0.20±0.01 | ND        | ND        |

|                                       |       |      |    |           |            |            |           |           |           |           |           |           |    |
|---------------------------------------|-------|------|----|-----------|------------|------------|-----------|-----------|-----------|-----------|-----------|-----------|----|
| 2-Furanmethanol                       | 9.76  | 865  | MS | 5.18±0.23 | ND         | ND         | ND        | ND        | ND        | ND        | ND        | ND        | ND |
| 2-Pentylfuran                         | 14.22 | 994  | MS | 8.50±0.70 | 13.14±3.29 | 14.37±0.25 | 3.97±0.58 | 6.54±0.62 | 1.55±0.32 | 5.92±0.25 | 8.29±2.02 | ND        | ND |
| 3-Methylbenzofuran                    | 17.58 | 1100 | MS | ND        | ND         | ND         | ND        | ND        | 0.25±0.01 | ND        | ND        | ND        | ND |
| 5-Heptyldihydro-2-furanone            | 24.92 | 1365 | MS | 0.07±0.01 | ND         | ND         | ND        | ND        | ND        | ND        | ND        | ND        | ND |
| <b>Sulfur-containing compounds(2)</b> |       |      |    |           |            |            |           |           |           |           |           |           |    |
| 1-Dodecanethiol                       | 20.25 | 1191 | MS | ND        | ND         | ND         | ND        | ND        | ND        | 0.19±0.01 | ND        | ND        | ND |
| 2-Formyl-3-methylthiophene            | 18.27 | 1125 | MS | ND        | ND         | ND         | ND        | ND        | ND        | ND        | ND        | 0.41±0.01 | ND |

---

ASC: Asian\_salmon and chicken, AS: Asian\_salmon, AP: Asian\_poultry, AF: Asian\_fish, AC: Asian\_chicken, IS: International\_salmon, IST: International\_turkey and salmon, IS2: International\_salmon, IS3: International\_salmon, IS4: International\_salmon. Data represent the mean ± SD in triplicate.  
1)RT: retention time 2)RI: retention indices 3)I.D.: identification 4)ND: not detected
